# Supplementary material for: Antibiotic use in South Korea from 2007 to 2014: A health insurance database-generated time series analysis
Source: PubMed Central journal article supplement (PMC5435228; doi:10.1371/journal.pone.0177435), 2017-05-17
Supplement: pone.0177435.s001.pdf [file pone.0177435.s001.pdf]

| Gender | Age group | Service type | ATC3level | DDD07     | DDD08     | DDD09     | DDD10     | DDD11     | DDD12     | DDD13     | DDD14     |
|--------|-----------|--------------|-----------|-----------|-----------|-----------|-----------|-----------|-----------|-----------|-----------|
| 2      | >=65      | 2            | J01F      | 3195484.0 | 3740546.4 | 4099737.7 | 4431343.7 | 4447973.2 | 4922068.3 | 5070185.5 | 5734270.5 |
| 2      | >=65      | 2            | J01G      | 1026146.6 | 1101168.9 | 1092954.4 | 1079423.9 | 1016636.2 | 997443.6  | 919484.8  | 871143.6  |
| 2      | >=65      | 2            | J01M      | 4696216.7 | 5147175.1 | 5278274.1 | 5348481.9 | 5382537.6 | 5844663.8 | 5834978.3 | 5725303.5 |
| 2      | >=65      | 2            | J01X      | 15243.5   | 14206.6   | 14224.7   | 18773.9   | 19448.9   | 19747.7   | 24184.1   | 27142.7   |
